# Supplementary material for: A Scoping Review of Supply Chain Management Systems for Point of Care Diagnostic Services: Optimising COVID-19 Testing Capacity in Resource-Limited Settings
Source: MDPI journal article supplement (doi:10.3390/diagnostics11122299), 2021-12-08
Supplement: s1 [file s1]

| RefID | First author | Year | Title                                |
|-------|--------------|------|--------------------------------------|
| 1     | Wahlfeld     | 2019 | HIV Rapid Diagnostic Test Invento    |
| 2     | Palmer       | 2020 | Improving the effectiveness of poi   |
| 3     | Magesa       | 2020 | Factors associated with stock out    |
| 4     | Maddox       | 2017 | Assessing stakeholder perception     |
| 5     | Hasselback   | 2014 | Rapid diagnostic test supply chair   |
| 6     | Dassah       | 2018 | Rollout of rapid point of care tests |
| 7     | Betran       | 2018 | Provision of medical supply kits tc  |
| 8     | Blanas       | 2013 | Barriers to community case mana      |
| 9     | Mabey        | 2012 | Point-of-Care Tests to Strengthen    |
| 10    | Hamer        | 2012 | Quality and safety of integrated cc  |
| 11    | Hussain      | 2013 | Public health system readiness to    |
| 12    | Albertini    | 2012 | Malaria rapid diagnostic test trans  |
| 13    | Boadu        | 2016 | Challenges with implementing ma      |
| 14    | Ekambaram    | 2019 | Analysis of Failure Modes: Case s    |
| 15    | Asiimwe      | 2012 | Early experiences on the feasibilit  |

1.

1.2. Are the qualitative data collection methods adequate to address the research question?

Yes

**QUALITATIVE STUDIES**

| 1.3. Are the findings adequately derived from the data? | 1.4. Is the interpretation of results sufficiently substantiated by data? | 1.5. Is there coherence between qualitative data sources, collection, analysis and interpretation? | 2.1. Is randomization appropriately performed? |
|---------------------------------------------------------|---------------------------------------------------------------------------|----------------------------------------------------------------------------------------------------|------------------------------------------------|
| Yes                                                     | Yes                                                                       | Yes                                                                                                |                                                |
| Yes                                                     | Yes                                                                       | Yes                                                                                                |                                                |
|                                                         |                                                                           |                                                                                                    | Yes                                            |
|                                                         |                                                                           |                                                                                                    | Yes                                            |
|                                                         |                                                                           |                                                                                                    | Yes                                            |
| Yes                                                     | Yes                                                                       | Yes                                                                                                |                                                |
| Yes                                                     | No                                                                        | Yes                                                                                                |                                                |

## 2. RANDOMIZED CONTROLLED TRIALS

2.2. Are the groups comparable at baseline?

2.3. Are there complete outcome data?

2.4. Are outcome assessors blinded to the intervention provided?

2.5 Did the participants adhere to the assigned intervention?

Yes

No

Yes

### 3. NON-RANDOMIZED STUDIES

3.1. Are the participants representative of the target population?

3.2. Are measurements appropriate regarding both the outcome and intervention (or exposure)?

3.3. Are there complete outcome data?

3.4. Are the confounders accounted for in the design and analysis?

| 3.5. During the study period, is the intervention administered (or exposure occurred) as intended? | 4. QUANTITATIVE DESCRIPTIVE                                              |                                                             |                                        |
|----------------------------------------------------------------------------------------------------|--------------------------------------------------------------------------|-------------------------------------------------------------|----------------------------------------|
|                                                                                                    | 4.1. Is the sampling strategy relevant to address the research question? | 4.2. Is the sample representative of the target population? | 4.3. Are the measurements appropriate? |
|                                                                                                    | Yes                                                                      | Yes                                                         | Yes                                    |

|     |     |     |
|-----|-----|-----|
| Yes | Yes | No  |
| No  | Yes | Yes |

| STUDIES                                   |                                                                               | 5. M                                                                                                   |                                                                                                        |
|-------------------------------------------|-------------------------------------------------------------------------------|--------------------------------------------------------------------------------------------------------|--------------------------------------------------------------------------------------------------------|
| 4.4. Is the risk of nonresponse bias low? | 4.5. Is the statistical analysis appropriate to answer the research question? | 5.1. Is there an adequate rationale for using a mixed methods design to address the research question? | 5.2. Are the different components of the study effectively integrated to answer the research question? |
| Yes                                       | Yes                                                                           | Yes                                                                                                    | Yes                                                                                                    |
|                                           |                                                                               | Yes                                                                                                    | Yes                                                                                                    |
| Yes                                       | Yes                                                                           |                                                                                                        |                                                                                                        |
| Yes                                       | Yes                                                                           |                                                                                                        |                                                                                                        |

## FIXED METHODS STUDIES

| 5.3. Are the outputs of the integration of qualitative and quantitative components adequately interpreted? | 5.4. Are divergences and inconsistencies between quantitative and qualitative results adequately addressed? | 5.5. Do the different components of the study adhere to the quality criteria of each tradition of the methods involved? |
|------------------------------------------------------------------------------------------------------------|-------------------------------------------------------------------------------------------------------------|-------------------------------------------------------------------------------------------------------------------------|
| Yes                                                                                                        | Yes                                                                                                         | Yes                                                                                                                     |



**COMMENTS**

|                                                                                                                 | <b>Score</b> |
|-----------------------------------------------------------------------------------------------------------------|--------------|
|                                                                                                                 | 100%         |
|                                                                                                                 | 100%         |
|                                                                                                                 | 100%         |
|                                                                                                                 | 100%         |
|                                                                                                                 | 100%         |
|                                                                                                                 | 100%         |
|                                                                                                                 | 100%         |
|                                                                                                                 | 100%         |
|                                                                                                                 | 100%         |
|                                                                                                                 | 100%         |
|                                                                                                                 | 100%         |
|                                                                                                                 | 100%         |
| Insuffiecient information provided on how the devices monitoring temperature were loaded in transport system    | 95%          |
|                                                                                                                 | 100%         |
| Type of sampling strategy used not discussed                                                                    | 90%          |
| Data are of reported responses which could mean that there was some degree of measurement error and social bias | 92%          |
