# Supplementary material for: A Scoping Review of Supply Chain Management Systems for Point of Care Diagnostic Services: Optimising COVID-19 Testing Capacity in Resource-Limited Settings
Source: MDPI journal article supplement (doi:10.3390/diagnostics11122299), 2021-12-08
Supplement: s1 [file s1]

# A Scoping Review for supply chain management systems for point of care diagnostics services: Optimising COVID-19 testing capacity in resource-limited settings.

Stage 3: Full-text screening

---

\* Required

1. Email \*

---

2. Reviewer

*Mark only one oval.*

☐ KM

☐ EM

☐ TD

3. Author & Date

---

## 4. Study Title

---

---

---

---

---

## 5. Does the study provide evidence of point of care diagnostics services?

*Mark only one oval.*

☐ Yes

☐ No

## 6. Does the study provide evidence of point of care diagnostics services performed near/close to the patient?

*Mark only one oval.*

☐ Yes

☐ No

7. Does the study provide evidence of accessibility of POC diagnostic tests?

*Mark only one oval.*

☐ Yes

☐ No

8. Does the study provide evidence of availability of POC diagnostic tests?

*Mark only one oval.*

☐ Yes

☐ No

9. Does the study provide evidence of supply chain management in general?

*Mark only one oval.*

☐ Yes

☐ No

10. Does the study provide evidence of POC diagnostic test production?

*Mark only one oval.*

☐ Yes

☐ No

11. Does the study provide evidence of POC diagnostic test selection?

*Mark only one oval.*

☐ Yes

☐ No

12. Does the study provide evidence of POC diagnostic test quantification?

*Mark only one oval.*

☐ Yes

☐ No

13. Does the study provide evidence of POC diagnostic test procurement?

*Mark only one oval.*

☐ Yes

☐ No

14. Does the study provide evidence of POC diagnostic test storage?

*Mark only one oval.*

☐ Yes

☐ No

15. Does the study provide evidence of POC diagnostic test distribution?

*Mark only one oval.*

☐ Yes

☐ No

16. Does the study provide evidence of POC diagnostic test redistribution?

*Mark only one oval.*

☐ Yes

☐ No

17. Does the study provide evidence of POC diagnostic test quality assurance?

*Mark only one oval.*

☐ Yes

☐ No

18. Does the study provide evidence of POC diagnostic test inventory management?

*Mark only one oval.*

☐ Yes

☐ No

19. Does the study provide evidence of safe disposal of used POC diagnostic tests?

*Mark only one oval.*

☐ Yes

☐ No

20. Does the study provide evidence of negotiations with suppliers for POC diagnostic test supply?

*Mark only one oval.*

☐ Yes

☐ No

21.

*Mark only one oval.*

☐ Option 1

---

This content is neither created nor endorsed by Google.

**Google** Forms
