# Supplementary material for: A Scoping Review of Supply Chain Management Systems for Point of Care Diagnostic Services: Optimising COVID-19 Testing Capacity in Resource-Limited Settings
Source: MDPI journal article supplement (doi:10.3390/diagnostics11122299), 2021-12-08
Supplement: s1 [file s1]

**Project Title:** A Scoping Review for supply chain management systems for point of care diagnostics services: Optimising COVID-19 testing capacity in resource-limited settings  
**Contributor Author:** Kuhlula Maluleke, Thobeka Dlangalala, Alfred Musekiwa, Kabelo Kgarosi, Emily Mac Gregor, Sphamandla Nke  
**Documnet Title:** Search Summary Table (SST) template

| Project                               |        |                                           |             |             |          |                     |                |            |                        |     |    |
|---------------------------------------|--------|-------------------------------------------|-------------|-------------|----------|---------------------|----------------|------------|------------------------|-----|----|
| Included references                   | Format | Database searches (date run, date re-run) |             |             |          |                     |                |            | Supplementary searches |     |    |
|                                       |        | PubMed                                    | Medline     | Scopus      | ProQuest | CINAHL              | Web of Science | PsychInfo  | wss                    | bcs | hs |
| Albertini 2012                        | Jnl    | x                                         | x           |             |          | x                   | x              |            |                        |     |    |
| Alemnji 2011                          | Jnl    | x                                         | x           |             |          | x                   |                |            |                        |     |    |
| Alemnji 2020                          | Jnl    | x                                         | y           |             |          | x                   |                |            |                        |     |    |
| Hamer 2012                            | Jnl    | x                                         | x           | x           |          | x                   |                |            |                        |     |    |
| Asiimwe 2012                          | Jnl    | x                                         | x           |             |          | x                   |                |            |                        |     |    |
| Betran 2018                           | Jnl    | x                                         | x           |             |          | x                   |                |            |                        |     |    |
| Blanas 2013                           | Jnl    | x                                         | x           | x           |          |                     | x              |            |                        |     |    |
| Boadu 2016                            | Jnl    | x                                         | x           |             |          | x                   |                |            |                        |     |    |
| Bristow 2015                          | Jnl    | x                                         | x           | x           |          |                     |                |            |                        |     |    |
| Cheng 2016                            | Jnl    | n                                         | x           | x           |          |                     |                |            |                        |     |    |
| Dassah 2018                           | Jnl    | x                                         | x           | x           |          | x                   |                |            |                        |     |    |
| Ekambaram 2019                        | Jnl    | x                                         | x           | x           |          |                     |                |            |                        |     |    |
| Hasselback 2014                       | Jnl    | x                                         | x           |             |          | x                   | x              |            |                        |     |    |
| Hussain 2013                          | Jnl    | n                                         | x           | x           |          |                     |                |            |                        |     |    |
| Kuupiel, Bawontuo 2017                | Jnl    | x                                         | x           | x           |          |                     |                |            |                        |     |    |
| Kuupiel, Tlou 2019                    | Jnl    | x                                         | x           | x           |          |                     |                |            |                        |     |    |
| Kuupiel, Bawontuo 2019                | Jnl    | x                                         | x           | x           |          |                     |                |            |                        |     |    |
| Kuupiel, Donkoh 2019                  | Jnl    | x                                         | x           | x           |          |                     |                |            |                        |     |    |
| Maddox 2017                           | Jnl    | x                                         | x           | x           |          |                     | x              |            |                        |     |    |
| Magesa 2019                           | Jnl    | x                                         | x           |             |          |                     |                |            |                        |     |    |
| Palmer 2020                           | Jnl    | x                                         | y           | x           |          |                     |                |            |                        |     |    |
| Peeling 2015                          | Jnl    | x                                         | x           | x           |          |                     | x              |            |                        |     |    |
| Stevens 2014                          | Jnl    | n                                         | x           | x           |          |                     |                |            |                        |     |    |
| Mabey 2012                            | Jnl    | n                                         | n           | n           |          |                     |                |            |                        | x   |    |
| Wahlfield 2019                        | Jnl    | x                                         | x           | x           |          |                     |                |            |                        |     |    |
| Valera 2021                           | Gray   | n                                         |             |             |          |                     |                |            | x                      |     |    |
| WHO 2021                              | Gray   | n                                         |             |             |          |                     |                |            | x                      |     |    |
| Benda 2021                            | Jnl    | x                                         |             |             |          |                     |                |            |                        |     |    |
| Poole                                 | Jnl    | x                                         |             |             |          |                     |                |            |                        |     |    |
| Kumar                                 | Jnl    | x                                         |             |             |          |                     |                |            |                        |     |    |
| Fleming                               | jnl    | x                                         |             |             |          |                     |                |            |                        |     |    |
| No. included refs                     |        | 28                                        | 22          | 16          | 0        | 9                   | 5              | 0          | 2                      | 1   | 0  |
| No. unique refs                       |        | 0                                         | 0           | 0           | 0        | 1                   | 0              | 0          | 0                      | 0   | 0  |
| No. refs screened                     |        | 18                                        | 35          | 32          | 0        | 32                  | 33             | 0          |                        |     |    |
| Yield                                 |        | 52                                        | 369         | 184         | 28       | 184                 | 46             | 2          |                        |     |    |
| Sensitivity                           |        | 96.55172414                               | 75.86206897 | 55.17241379 | 0        | 31.03448276         | 17.24137931    | 0          |                        |     |    |
| Precision                             |        | 53.84615385                               | 5.962059621 | 8.695652174 | 0        | 4.891304348         | 10.86956522    | 0          |                        |     |    |
| No. database searches carried out =   |        |                                           |             |             | 7        |                     |                |            |                        |     |    |
| Sum of yields =                       |        |                                           |             |             | 1206     | Overall sensitivity |                | 93.5483871 |                        |     |    |
| No. refs screened at Ti&Ab =          |        |                                           |             |             | 147      | Overall precision   |                | 19.73      |                        |     |    |
| No. refs screened at FT=              |        |                                           |             |             | 41       | NNR                 |                | 5          |                        |     |    |
| No. of included refs from searching = |        |                                           |             |             | 29       | NNR FT              |                | 1          |                        |     |    |
| Total no. of included refs =          |        |                                           |             |             | 31       | NNS                 |                | 4          |                        |     |    |

**Codes**

x = found from the search

y = in database; found when search strategy re-run

n = not in the database

z = in the database; not found using the search strategy

(red) = databases where searches re-run

**Format codes**

jnl = journal article

ths = PhD thesis

**Other codes**

NNR = number needed to read. 1/overall precision

NNR FT = number needed to read at FT to find one included reference

**Supplementary**

fcs = forwards c

bcs = backward

hs = hand searc

wss= website se

org= from conta
