# Supplementary material for: A Scoping Review of Supply Chain Management Systems for Point of Care Diagnostic Services: Optimising COVID-19 Testing Capacity in Resource-Limited Settings
Source: MDPI journal article supplement (doi:10.3390/diagnostics11122299), 2021-12-08
Supplement: s1 [file s1]

# Full article screening results

1=Yes, 0=No

| Author & Date          | Reviewer 1 (EM) | Reviewer 2 (KM) |
|------------------------|-----------------|-----------------|
| Albert 2020            | 0               | 0               |
| Albertini 2012         | 1               | 1               |
| Alemnji 2011           | 1               | 1               |
| Alemnji 2020           | 1               | 1               |
| Astori 2020            | 0               | 0               |
| Hamer 2012             | 1               | 1               |
| Asiimwe 2012           | 1               | 1               |
| Barlow 2018            | 0               | 0               |
| Bazuin 2015            | 0               | 0               |
| Betran 2018            | 1               | 1               |
| Benda 2021             | 1               | 1               |
| Blanas 2013            | 1               | 1               |
| Botti-Lodovico 2021    | 0               | 0               |
| Boadu 2016             | 1               | 1               |
| Bristow 2015           | 1               | 1               |
| Brown 2018             | 0               | 0               |
| Burbano 2018           | 0               | 0               |
| Carlo 2015             | 0               | 0               |
| Cheng 2016             | 1               | 1               |
| Dalvantes 2019         | 0               | 0               |
| Daniel 2012            | 1               | 0               |
| Dassah 2018            | 1               | 1               |
| Everitt 2021           | 0               | 0               |
| Ekambaram 2019         | 1               | 1               |
| Futrell 2020           | 0               | 0               |
| Fleming 2021           | 1               | 1               |
| Fragala 2021           | 0               | 0               |
| Graham 2021            | 0               | 0               |
| Hasselback 2014        | 1               | 1               |
| Hussain 2013           | 1               | 1               |
| Jani Ilesh 2013        | 0               | 0               |
| Kabir 2021             | 0               | 0               |
| Kumar 2021             | 1               | 1               |
| Kuupiel, Bawontuo 2017 | 1               | 1               |
| Kuupiel, Tlou 2019     | 1               | 1               |
| Kuupiel, Bawontuo 2019 | 1               | 1               |
| Kuupiel, Donkoh 2019   | 1               | 1               |
| Koksaldi 2021          | 0               | 0               |
| Lauria 2019            | 0               | 0               |
| Loeffelholz 2021       | 0               | 0               |

|                |   |   |
|----------------|---|---|
| Maddox 2017    | 1 | 1 |
| Magesa 2019    | 1 | 1 |
| Mattioli 2021  | 0 | 0 |
| Palmer 2020    | 1 | 1 |
| Parapudi 2021  | 0 | 0 |
| Peeling 2017   | 0 | 0 |
| Peeling 2015   | 1 | 1 |
| Peeling 2009   | 0 | 0 |
| Peter 2017     | 1 | 0 |
| Peterson       | 0 | 0 |
| Poole 2021     | 1 | 1 |
| Rahman 2021    | 0 | 0 |
| Renju 2021     | 0 | 0 |
| Stevens 2014   | 1 | 1 |
| Sunyota 2019   | 0 | 0 |
| Toskin 2016    | 0 | 0 |
| Mabey 2012     | 1 | 1 |
| Valera 2021    | 1 | 1 |
| Vogels 2021    | 0 | 0 |
| Wahlfield 2019 | 1 | 1 |
| Wilson 2020    | 0 | 0 |
| WHO 2021       | 1 | 1 |

Expected

Agreement agreement Kappa Std. err. Z Prob>Z

-----

96.77% 50.00% 0.9355 0.1267 7.38 0.0000

| Reviewer 1        | Reviewer 2 (KM) |    |       |
|-------------------|-----------------|----|-------|
| (EM)              | 0               | 1  | Total |
| -----+-----+----- |                 |    |       |
| 0                 | 31              | 2  | 33    |
| 1                 | 0               | 29 | 29    |
| -----+-----+----- |                 |    |       |
| Total             | 31              | 31 | 62    |

```
. mcc Reviewer1EM Reviewer2KM
```

| Cases     | Controls |           | Total |
|-----------|----------|-----------|-------|
|           | Exposed  | Unexposed |       |
| Exposed   | 31       | 2         | 33    |
| Unexposed | 0        | 29        | 29    |
| Total     | 31       | 31        | 62    |

```
McNemar's chi2(1) =      2.00      Prob > chi2 = 0.1573
Exact McNemar significance probability      = 0.5000
```

```
Proportion with factor
```

|            |          |                      |           |
|------------|----------|----------------------|-----------|
| Cases      | .5322581 |                      |           |
| Controls   | .5       | [95% conf. interval] |           |
|            | -----    | -----                |           |
| difference | .0322581 | -.0278506            | .0923667  |
| ratio      | 1.064516 | .9761481             | 1.160884  |
| rel. diff. | .0645161 | -.0219646            | .1509969  |
| odds ratio | .        | .1878091             | . (exact) |
