# Supplementary material for: A Scoping Review of Supply Chain Management Systems for Point of Care Diagnostic Services: Optimising COVID-19 Testing Capacity in Resource-Limited Settings
Source: MDPI journal article supplement (doi:10.3390/diagnostics11122299), 2021-12-08
Supplement: s1 [file s1]

# **A Scoping Review for supply chain management systems for point of care diagnostics services: Optimising COVID-19 testing capacity in resource-limited settings.**

Kuhlula Maluleke<sup>1</sup>, Thobeka Dlangalala<sup>1</sup>, Alfred Musekiwa<sup>1</sup>, Kabelo Kgarosi<sup>2</sup>, Emily Mac Gregor<sup>3</sup>, Sphamandla Nkambule<sup>4</sup>, Tivani Mashamba-Thompson<sup>5</sup>

## **Database search results**

| Date of search | Electronic Database | Keywords/MeSH terms                                                                                                                                                                                                                                                                                                                                                                                                                                                                                                                                                                                                                                                                                                                                                                         | Number of retrieved studies |
|----------------|---------------------|---------------------------------------------------------------------------------------------------------------------------------------------------------------------------------------------------------------------------------------------------------------------------------------------------------------------------------------------------------------------------------------------------------------------------------------------------------------------------------------------------------------------------------------------------------------------------------------------------------------------------------------------------------------------------------------------------------------------------------------------------------------------------------------------|-----------------------------|
| 07/06/2021     | PubMed              | ("Supply Chain Management" OR "Supply Chains" OR "Supply Chain"OR Logistics OR "Supply Chain Management (SCM)" OR "Sustainable Supply Chains" OR "SCM" OR "Sustainable Supply Chain Management" OR "Supply Chain Management System" OR "Supply-chain Management" OR "Chain Management" OR "Supply Chain Management Practices" OR "Logistics And Supply Chain Management") AND (point of care testing" OR "Point-of-Care Systems" OR "Point-of-care Testing" OR "Diagnostic Test" OR "Point Of Care System" OR "Point Of Care" OR "POCT)                                                                                                                                                                                                                                                     | 52                          |
| 09/06/2021     | Ebsco Medline       | ((("supply chain management") OR ("Supply Chain*") OR "SCM" OR ("Sustainable Supply Chains") OR ("Supply Chain Management System") OR ("Supply-chain Management") OR ("Chain Management") OR ("Supply Chain Management Practices") OR ("logistics and supply chain management")) AND (((MH "Point-of-Care Testing")) OR ("point of care testing") OR ((MH "Point-of-Care Systems")) OR ("Point-of-care Testing") OR ("Diagnostic Test") OR ("Point Of Care System") OR ("Point Of Care*") OR "POCT") AND ((("supply chain management") OR ("Supply Chain*") OR "SCM" OR ("Sustainable Supply Chains") OR ("Supply Chain Management System") OR ("Supply-chain Management") OR ("Chain Management") OR ("Supply Chain Management Practices") OR ("logistics and supply chain management")))) | 81                          |

|            |                    |                                                                                                                                                                                                                                                                                                                                                                                                                                                                                                                                                                                                                                                                                                                                          |     |
|------------|--------------------|------------------------------------------------------------------------------------------------------------------------------------------------------------------------------------------------------------------------------------------------------------------------------------------------------------------------------------------------------------------------------------------------------------------------------------------------------------------------------------------------------------------------------------------------------------------------------------------------------------------------------------------------------------------------------------------------------------------------------------------|-----|
| 07/06/2021 | Scopus             | ( "Supply Chain Management" OR "Supply Chains" OR "Supply Chain" OR logistics OR "Supply Chain Management (SCM)" OR "Sustainable Supply Chains" OR "SCM" OR "Sustainable Supply Chain Management" OR "Supply Chain Management System" OR "Supply-chain Management" OR "Chain Management" OR "Supply Chain Management Practices" OR "Logistics And Supply Chain Management" "Supply Chain Management" OR "Supply Chains" OR "Supply Chain" OR "Supply Chain Management (SCM)" OR "Sustainable Supply Chains" OR "SCM" OR "Sustainable Supply Chain Management" OR "Supply Chain Management System" OR "Supply-chain Management" OR "Chain Management" OR "Supply Chain Management Practices" OR "Logistics And Supply Chain Management" ) | 187 |
| 07/06/2021 | EbscoHost (CINAHL) | ( "point of care testing" OR "Point-of-Care Systems" OR "Point-of-care Testing" OR "Diagnostic Test" OR "Point Of Care System" OR "Point Of Care" OR "POCT" ) AND ( "Supply Chain Management" OR "Supply Chains" OR "Supply Chain" OR "Supply Chain Management (SCM)" OR "Sustainable Supply Chains" OR "SCM" OR "Sustainable Supply Chain Management" OR "Supply Chain Management System" OR "Supply-chain Management" OR "Chain Management" OR "Supply Chain Management Practices" OR "Logistics And Supply Chain Management" )                                                                                                                                                                                                        | 184 |
| 10/06/2021 | PsychInfo          | ((Supply Chain) OR (Supply Chain Management) OR SCM) AND ((point "of" care) OR (point "of" care test*) OR (poc OR poct) OR (Point-of-Care System*) OR (Diagnostic Test*))                                                                                                                                                                                                                                                                                                                                                                                                                                                                                                                                                                | 2   |
| 07/06/2021 | Ovid Medline       | ("point-of-care systems" OR "Point-of-care Testing" OR "Point care Testing" OR "Point Care System" OR "Point Care" AND ("Supply Chain Management" OR "Supply Chain manag" OR "Supply Chain" OR "Delivery of Health Care"))                                                                                                                                                                                                                                                                                                                                                                                                                                                                                                               | 288 |
| 10/06/2021 | Web of Science     | ("point of care test" OR "Point of Care") AND ( "Supply Chain Management" OR "Supply Chain" )                                                                                                                                                                                                                                                                                                                                                                                                                                                                                                                                                                                                                                            | 46  |
| 01/07/2021 | ProQuest           | ("point of care test" OR "Point of Care") AND ( "Supply Chain Management" OR "Supply Chain" )                                                                                                                                                                                                                                                                                                                                                                                                                                                                                                                                                                                                                                            | 28  |
| 28/10/2021 | PubMed             | Search: (("point-of-care testing"[MeSH Terms] OR "point-of-care systems"[MeSH Terms] OR "point of care testing" OR "Point-of-Care Systems" OR "Point-of-care                                                                                                                                                                                                                                                                                                                                                                                                                                                                                                                                                                             | 316 |

|            |        |                                                                                                                                                                                                                                                                                                                                                                                                                                                                                                                                                                                                                                                                                                                                                                                                                                  |   |
|------------|--------|----------------------------------------------------------------------------------------------------------------------------------------------------------------------------------------------------------------------------------------------------------------------------------------------------------------------------------------------------------------------------------------------------------------------------------------------------------------------------------------------------------------------------------------------------------------------------------------------------------------------------------------------------------------------------------------------------------------------------------------------------------------------------------------------------------------------------------|---|
|            |        | Testing" OR "Diagnostic Test" OR "Point Of Care System" OR "Point Of Care" OR POCT) AND ("Supply Chain Management" OR "Supply Chains" OR "Supply Chain"OR Logistics OR "Supply Chain Management (SCM)" OR "Sustainable Supply Chains" OR "SCM" OR "Sustainable Supply Chain Management" OR "Supply Chain Management System" OR "Supply-chain Management" OR "Chain Management" OR "Supply Chain Management Practices" OR "Logistics And Supply Chain Management")) AND (("COVID-19 Testing"[Mesh]) AND ( "COVID-19 Serological Testing"[Mesh] OR "COVID-19 Nucleic Acid Testing"[Mesh] OR "COVID-19"[Mesh] OR "SARS-CoV-2"[Mesh] ) OR "COVID-19" OR "Coronavirus Disease 2019" OR "SARS-CoV-2" OR "Severe Acute Respiratory Syndrome Coronavirus 2" OR Coronavirus "Covid-19" OR "SARS Coronavirus") Filters: in the last 1 year |   |
| 28/10/2021 | Google | ("point of care test" OR "Point of Care") AND ( "Supply Chain Management" OR "Supply Chain" )                                                                                                                                                                                                                                                                                                                                                                                                                                                                                                                                                                                                                                                                                                                                    | 8 |
