# Supplementary material for: A Scoping Review of Supply Chain Management Systems for Point of Care Diagnostic Services: Optimising COVID-19 Testing Capacity in Resource-Limited Settings
Source: Diagnostics (Basel). 2021 Dec 8;11(12):2299. doi: 10.3390/diagnostics11122299 (PMC8700402; doi:10.3390/diagnostics11122299)
Supplement: Supplementary file 1 [file diagnostics-11-02299-s001.zip]

Archive with 6 entries (6 files):
- Supplementary Material File S1 Scoping Review Protocol.pdf
- Supplementary Material File S2 Electronic Database Search Results.pdf
- Supplementary Material File S3 Screening tool.pdf
- Supplementary Material File S4 Full Article Screening Results and Agreement New.pdf
- Supplementary Material File S5 Search Summary Table New.pdf
- Supplementary Material File S6 MMAT Quality Appraisal.pdf
